# Supplementary material
Source: MDPI journal article supplement (https://www.mdpi.com/2073-4395/12/4/790)
Supplement: s1 [file s1]

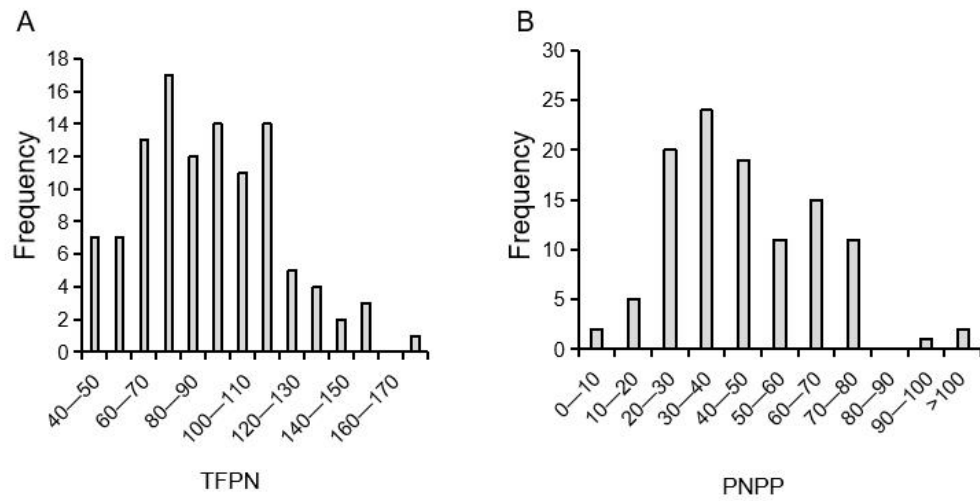

**Figure S1.** The observed frequencies of TFPN (**A**) and PNPP (**B**) in RHL family #5.

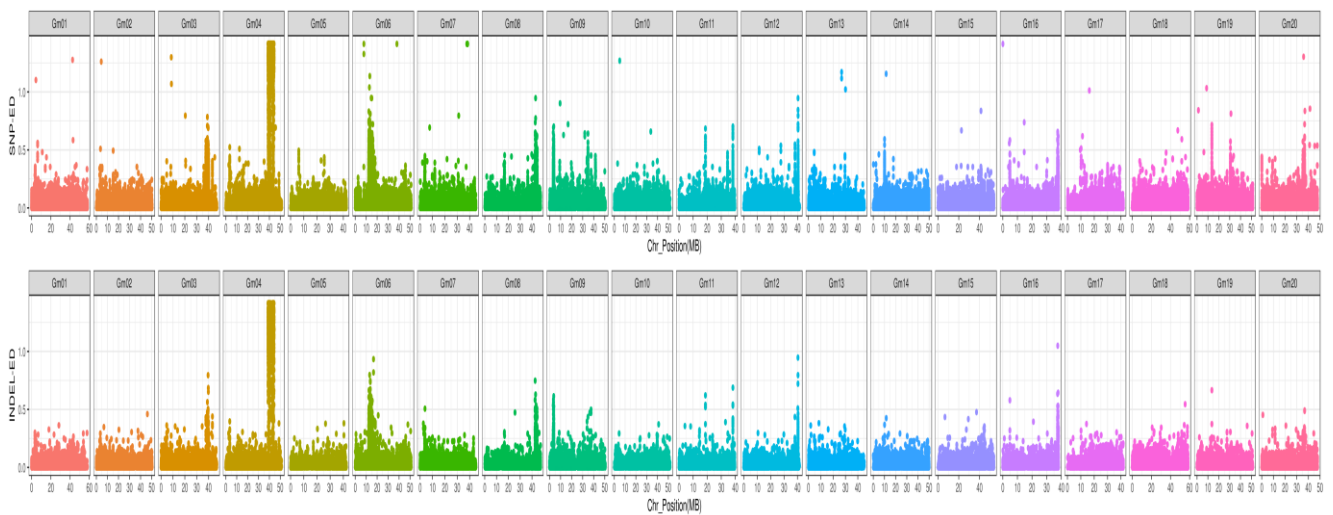

**Figure S2.** The distribution of Euclidean distance (ED)-associated values on 20 chromosomes.

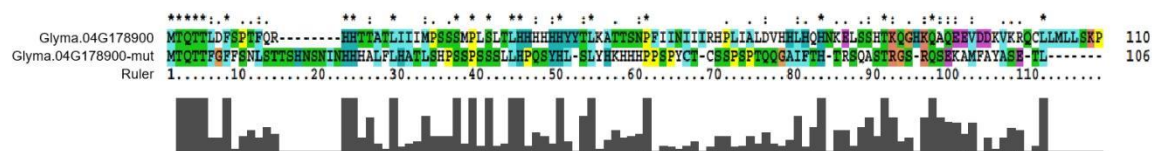

**Figure S3.** The protein sequence alignment of Glyma.04G178900 and its mutant (Glyma.04G178900-mut).

**Table S1.** Indel markers used for mapping QTL for TFPN and PNPP.

| Markers | Chromosome | Forward primer (5'-3')    | Reverse primer (5'-3')   |
|---------|------------|---------------------------|--------------------------|
| PSI0151 | GM2        | CGGGAATAACAGCAGAGATA      | CGAGTCCCTACTCAGTTCAC     |
| PSI0160 | GM2        | CATTGTTACTACTTTACACCTTTTG | TGACGAAAGCATCAATTAAA     |
| PSI0204 | GM2        | TGTTTACTTTTGTTAGACACCG    | AAAACCTCTTTTAGGGTGTGTTTT |
| PSI0213 | GM2        | GGAGCTTATTAGCTTCTTTGAT    | CAAAATTTCAAATAAAATCATGC  |
| PSI0295 | GM2        | TGCATTCAACACGAAATCTA      | TGCCTTTTTCTTCTCTTCTTC    |
| PSI0492 | GM4        | TCGTTTCTTTAGTAGGGTAGGA    | TGCACAAATAGTTAGATGAAACA  |
| PSI0526 | GM4        | TTTTGGAGTTAGGTTTGGTG      | CCATCGCATTTCAAAAGTTA     |
| PSI1469 | GM10       | TTCTCCGGTTGATGATAA        | ATTAACGCTTAATTCAACTTC    |
| PSI1531 | GM10       | TCTGTCAACGCAGTACTTCTC     | TCAGTGTTCACAACTGATGATT   |
| PSI1654 | GM11       | CCAAATTATTTTAGAGAAGATCG   | CAAATTCAGCCTGTGTCTTT     |
| PSI1797 | GM12       | GATTTCGTACCTCTTTATATTTTT  | CCTAATGCTTATGCCAAA       |
| PSI2296 | GM15       | GCAGTAAATGTGGACAAAAGA     | AAACACAGTGATGTTAGAAAAA   |
| PSI2368 | GM16       | CGTATCAGTCTGGATCATGG      | GAACAGTGTTGCTGTTGTTG     |
| PSI2525 | GM16       | AGTAGTCATTTATAAGAATTTTCAA | TTATCAACAATATTTTTAAAAGGG |
| PSI3010 | GM20       | CGACTAACTCTTAATGTATTTTGC  | CAACTTCACTCTCAGATCGC     |

**Table S2.** Indel markers used for fine mapping *qFPN4* locus and detecting NILs.

| Markers | Genomic position | Forward primer (5'-3')   | Reverse primer (5'-3')   |
|---------|------------------|--------------------------|--------------------------|
| ID4033  | 2513639          | GGGGCAATATCCCCAAAC       | CGATGCCCATTGTCTGAAT      |
| ID4082  | 3802178          | TCTTATGGCGCAAGGCTC       | TGTTATGAAACCAAAGGTTTCG   |
| ID4215  | 13760852         | ATGATGGTGGCCAGGAGA       | TGTTGCTTCTCATTAGGCCC     |
| ID4228  | 15655819         | TGGGATGCCTTAGTCCCA       | AGGAGGGAATTTCTCCTTCAG    |
| ID4237  | 16671461         | ACATTCCCGATGGAGGGT       | TGAGAAGAGTGAAGGATGGTG    |
| ID4254  | 20177422         | TTCTCCGACTGAACACCACA     | CCGTTGATCCAGAATCGG       |
| ID41032 | 24910066         | TTTGCCACATTTGGTGCTCCAACG | AGAGGAAGAAAGAGGAAGC      |
| ID41040 | 30260000         | TACACAGTTAATAAGGGAAGC    | GTTAATGAAATGTTTCTCGACTGG |
| C1-1    | 35948983         | TTCAAGCATCACACCCAAGA     | GGACTTCAACTCAACTCCCAA    |
| C1-2    | 41395555         | TTTTTGTGTGTTGCATTTGCAGC  | ATCTTTTAGAGAAGGTAATATGAG |
| C1-3    | 41559265         | GTATGTTGTGTGGGGTTCGATTCC | TCTAGTATACAATTCTGAATGACC |
| C1-4    | 41754458         | AAAAGCTAGCTATTGTAGTTG    | TAAAACCAATTTTCAGTAGCATGG |
| C1-5    | 44330411         | ATCTCCTTGCAACCGCAC       | TTGAGTATAATGGCCTTCCCA    |
| C1-6    | 44375173         | GCAAGTCAAAGTGGTTTGATG    | GCCCACTCTAATCGGCAT       |
| C1-7    | 44383419         | GGCGCATACATCGTCCTT       | AGGGTCATGGGGAGGTGT       |
| C1-8    | 44458681         | TTCAATTTTCATATTTTCATCTGC | CCCTTCTAGAATCCTTCACAACC  |
| C1-9    | 44697227         | AAGAGTTTTTCAATAATGATACC  | TAGTGTTTTAACTGAGATATTAC  |
| C1-10   | 45438062         | ATTTTCAGGGGGCTTTTCG      | TTCAGCGGCTTTCAGTCA       |
| ID4421  | 49830273         | ACTGCACATTGCCTGCTG       | ATGCTTGGACGCTTCTCG       |

**Table S3.** Mapping QTL for TFPN and PNPP in the F<sub>6</sub> JT RIL population.

| <b>Traits</b> | <b>Indels Marker</b> | <b>Genomic position</b> | <b>LOD</b> | <b><sup>1</sup>PVE (%)</b> | <b>Additive effect</b> |
|---------------|----------------------|-------------------------|------------|----------------------------|------------------------|
| TFPN          | C1-7                 | 44383419                | 4.64       | 13.1                       | 16.2                   |
| PNPP          | C1-5                 | 44330411                | 5.05       | 14.2                       | 17                     |

<sup>1</sup> phenotypic variation explanation ratio.
